# Supplementary material
Source: HighWire-hosted journal article supplement (http://www.qdcxjkg.com/highwire/filestream/113945/field_highwire_adjunct_files/0/erj00662-2012_online_supplementary_material.pdf)
Supplement: erj00662-2012_online_supplementary_material.pdf [file erj00662-2012_online_supplementary_material.pdf]

## **Hyperhomocysteinaemia predicts the decline in pulmonary function in healthy male smokers**

K. Nunomiya<sup>\*</sup>, Y. Shibata<sup>\*</sup>, S. Abe<sup>\*</sup>, S. Inoue<sup>\*</sup>, A. Igarashi<sup>\*</sup>, K. Yamauchi<sup>\*</sup>, Y. Aida<sup>\*</sup>, H. Kishi<sup>\*</sup>, M. Sato<sup>\*</sup>, T. Watanabe<sup>\*</sup>, T. Konta<sup>\*</sup>, Y. Ueno<sup>#</sup>, T. Kato<sup>#</sup>, H. Yamashita<sup>#</sup>, T. Kayama<sup>#</sup> and I. Kubota<sup>\*</sup>

<sup>\*</sup>*Department of Cardiology, Pulmonology, and Nephrology, #Global Center of Excellence Program Study Group, Yamagata University School of Medicine, Yamagata, Japan*

**Online Data Supplements**

## RESULTS

**Table S1. Univariate regression analysis of factors that were predictive for plasma homocysteine levels**

### Univariate

| Variable          | Coefficient | SE    | p value |
|-------------------|-------------|-------|---------|
| Age               | 0.087       | 0.009 | <.0001  |
| Male gender       | 1.291       | 0.092 | <.0001  |
| BMI               | 0.020       | 0.029 | 0.503   |
| Brinkman index    | 0.002       | 0.000 | <.0001  |
| mean BP           | 0.056       | 0.009 | <.0001  |
| HbA <sub>1c</sub> | -0.018      | 0.138 | 0.897   |
| ALT               | 0.022       | 0.007 | 0.001   |
| sCr               | 7.127       | 0.412 | <.0001  |
| TG                | 0.007       | 0.001 | <.0001  |
| TC                | -0.021      | 0.003 | <.0001  |
| %FVC              | -0.032      | 0.007 | <.0001  |
| %FEV <sub>1</sub> | -0.030      | 0.006 | <.0001  |

BMI: body mass index; BP: blood pressure; HbA<sub>1c</sub>: haemoglobin A<sub>1c</sub>; ALT:

alanine aminotransferase; sCr: serum creatinine; TG: triglyceride; TC: total

cholesterol; %FVC: percent predicted forced vital capacity; %FEV<sub>1</sub>: percent

predicted forced expiratory volume in 1 s

**Table S2. Differences in pulmonary function parameters between subjects with homocysteine levels above or below the cut-off value**

|                                             | Hcy $\leq 11 \mu\text{M}$ ( $n = 62$ ) | Hcy $> 11 \mu\text{M}$ ( $n = 81$ ) | p value |
|---------------------------------------------|----------------------------------------|-------------------------------------|---------|
| %FVC <sub>first</sub>                       | 100.28 $\pm$ 13.61                     | 95.96 $\pm$ 14.63                   | 0.073   |
| %FVC <sub>second</sub>                      | 105.12 $\pm$ 14.43                     | 99.54 $\pm$ 15.24                   | 0.028*  |
| %FEV <sub>1</sub> <sub>first</sub>          | 98.66 $\pm$ 14.20                      | 94.64 $\pm$ 18.30                   | 0.155   |
| %FEV <sub>1</sub> <sub>second</sub>         | 95.57 $\pm$ 14.54                      | 92.83 $\pm$ 19.82                   | 0.026*  |
| FEV <sub>1</sub> /FVC <sub>first</sub> (%)  | 77.25 $\pm$ 6.75                       | 76.96 $\pm$ 9.52                    | 0.837   |
| FEV <sub>1</sub> /FVC <sub>second</sub> (%) | 73.86 $\pm$ 7.96                       | 72.02 $\pm$ 10.24                   | 0.244   |
| $\Delta$ FEV <sub>1</sub> /year (%)         | -0.83 (-1.57, 0.37)                    | -1.77 (-2.84, 0)                    | 0.006*  |

Hcy data was not available for four of the 147 subjects. Differences in  $\Delta$ FEV<sub>1</sub>/year (%) between subjects with Hcy  $\leq 11 \mu\text{M}$  and those with Hcy  $> 11 \mu\text{M}$  were evaluated by the Mann-Whitney U test, because the data was not normally distributed. Differences in all other variables were evaluated by Student's t test. "first" indicates spirometry data at the first visit and "second" indicates spirometry data at the second visit. Hcy: homocysteine; FVC: forced vital capacity; FEV<sub>1</sub>: forced expiratory volume in 1 s;  $\Delta$ FEV<sub>1</sub>/year (%): percent annual decline in FEV<sub>1</sub>

## FIGURE LEGENDS

**FIGURE S1. Distribution of percent annual decline in FVC and FEV<sub>1</sub>.** The distributions of percent annual decline in FVC [dFVC/Y (%)] (A) and FEV<sub>1</sub> [dFEV<sub>1</sub>/Y (%)] (B) are shown as histograms. Dashed lines indicate the limit of the first quintile of percent annual decline in the spirometric measurements. FVC: forced vital capacity; FEV<sub>1</sub>: forced expiratory volume in 1 s

**FIGURE S2. Determination of the cut-off value of plasma homocysteine (Hcy) for discriminating subjects who showed a decline in FEV<sub>1</sub>.** Receiver operating characteristic (ROC) curve analysis was performed to determine the cut-off value of Hcy for discriminating the subjects who showed a decline in FEV<sub>1</sub>. The area under the curve (AUC) was 0.701, and the cut-off value was 11.1 μM, with a sensitivity of 0.897 and a specificity of 0.518. FEV<sub>1</sub>: forced expiratory volume in 1 s
